# Supplementary material
Source: PubMed Central journal article supplement (PMC3709995)

Online Supporting Material

a) *TNF $\alpha$*  expression

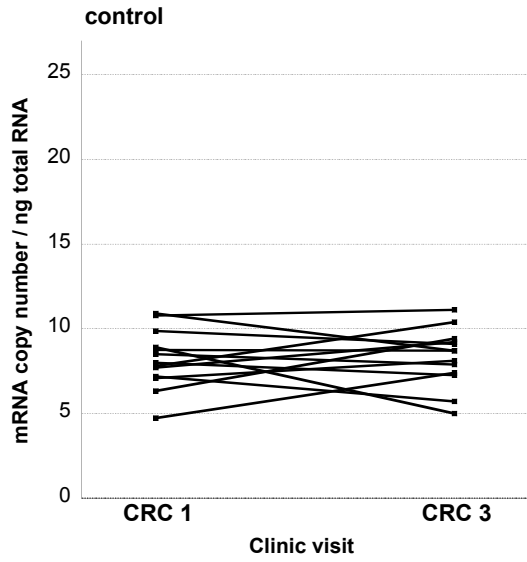

b) *IL6* expression

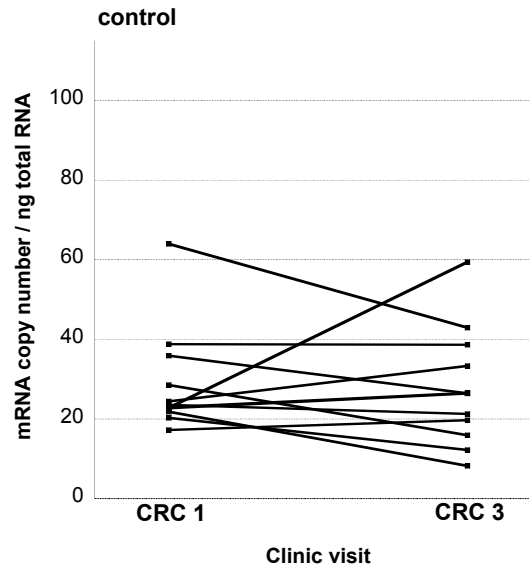

c) *CD14* expression

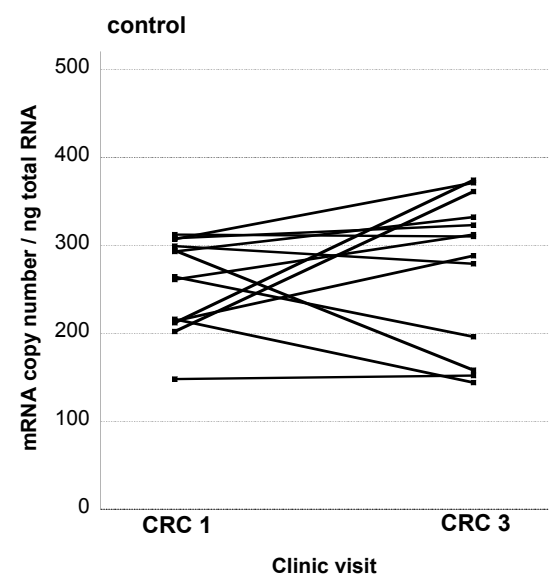

n3 PUFA

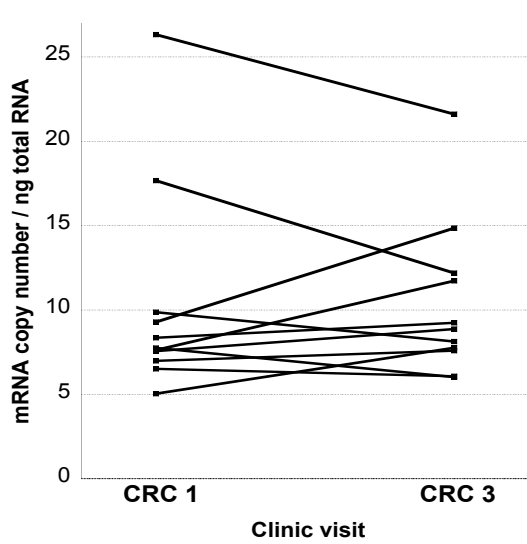

n3 PUFA

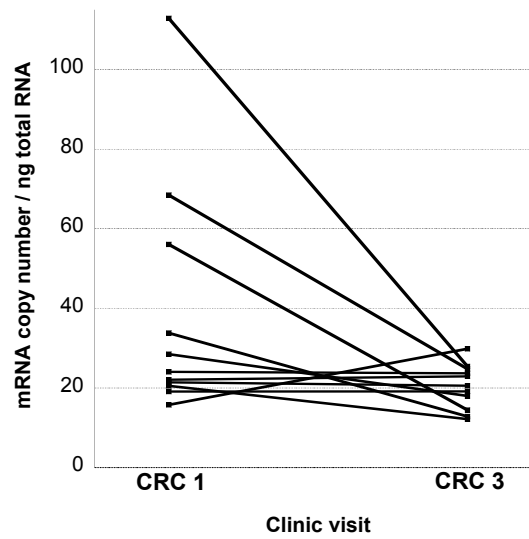

n3 PUFA

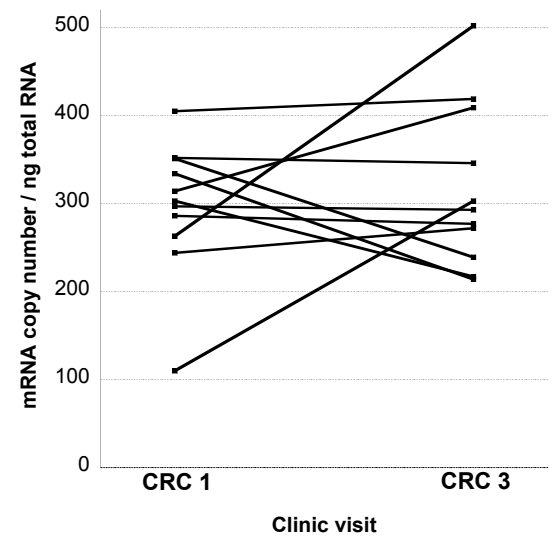

Online Supporting Material

d) *CCL2* expression

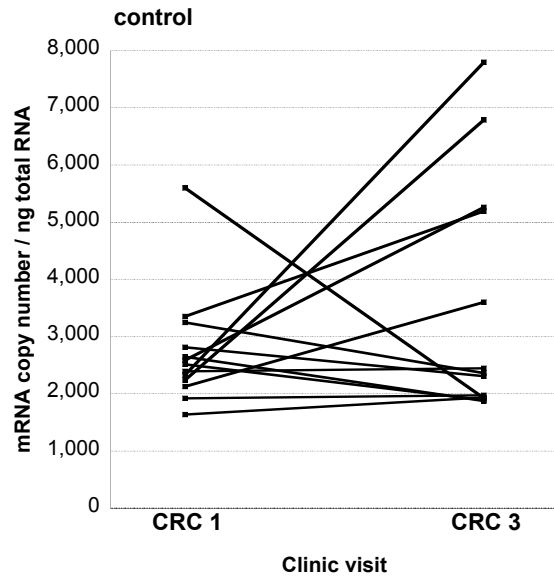

e) *ADIPOQ* expression

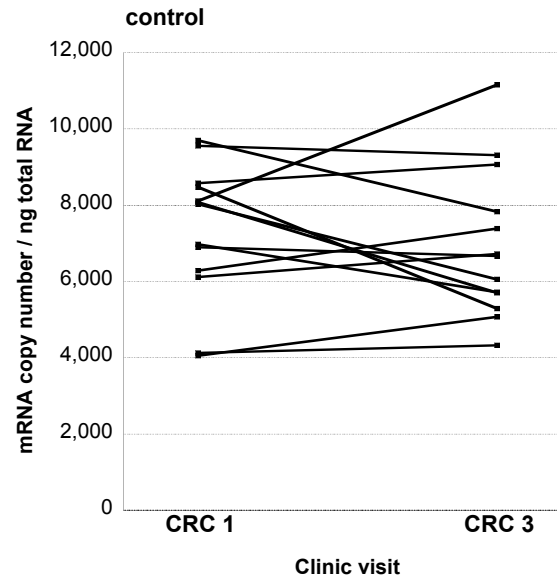

f) *ICAM1* expression

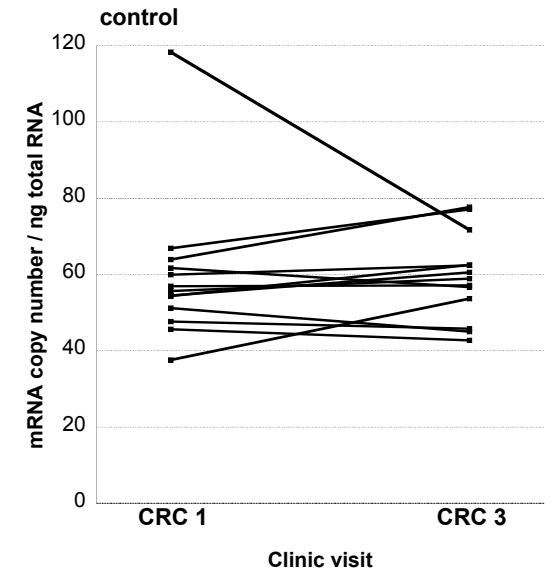

n3 PUFA

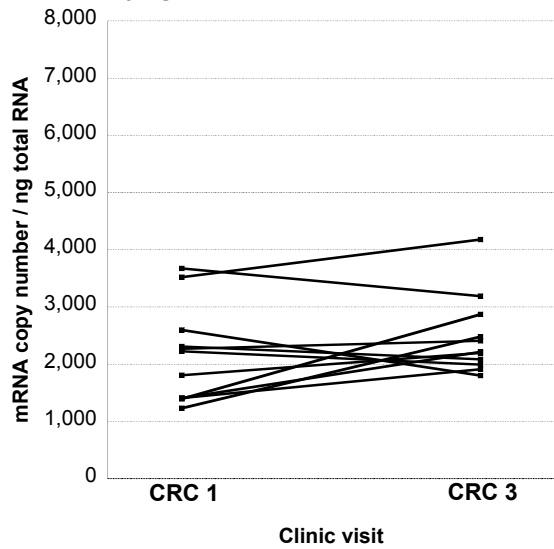

n3 PUFA

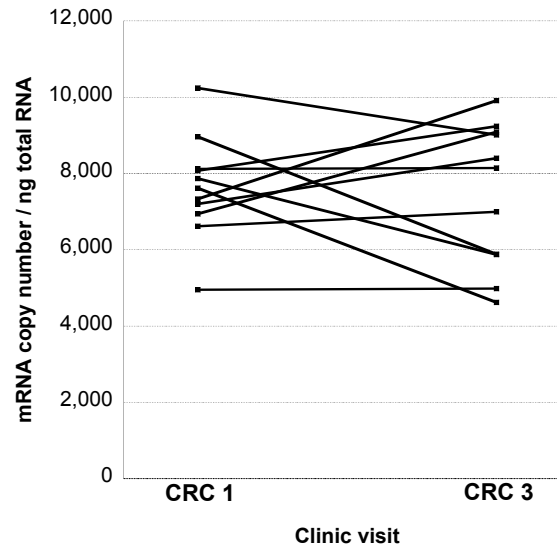

n3 PUFA

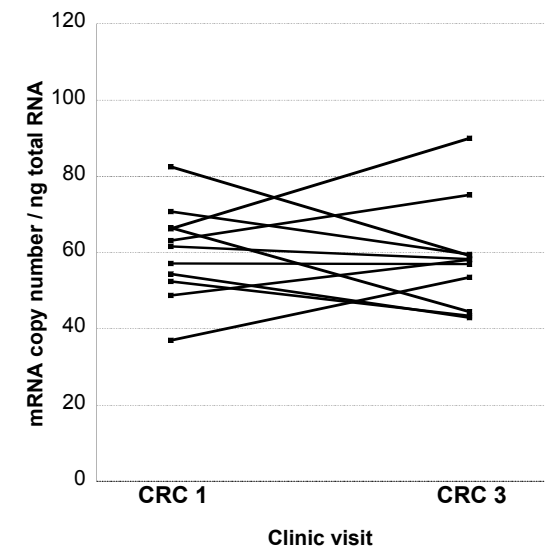

Online Supporting Material

g) *SAA1* expression

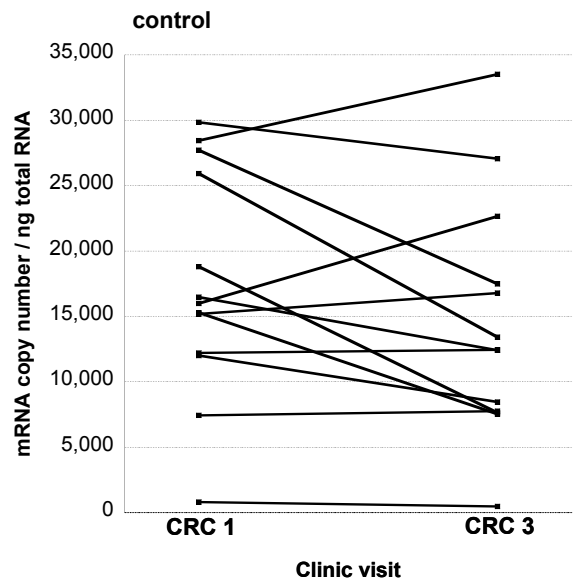

h) *CD206* expression

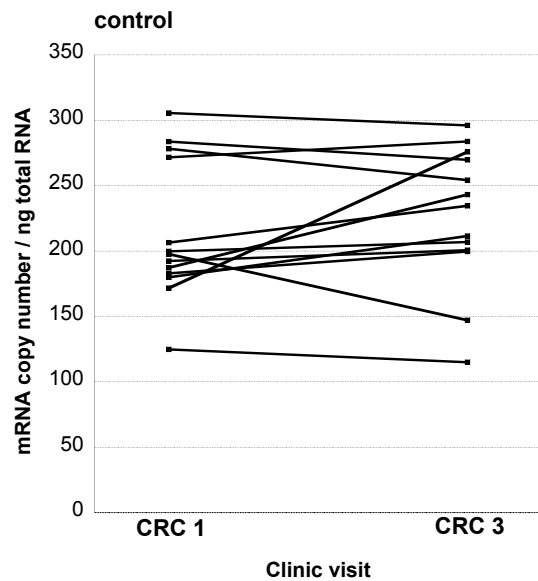

i) *TLR4* expression

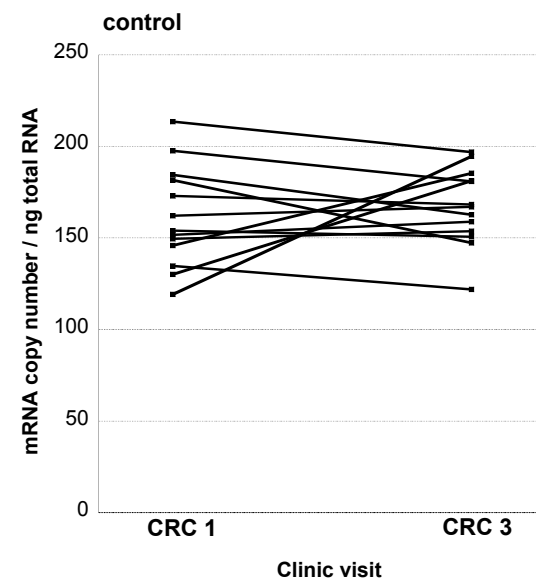

n3 PUFA

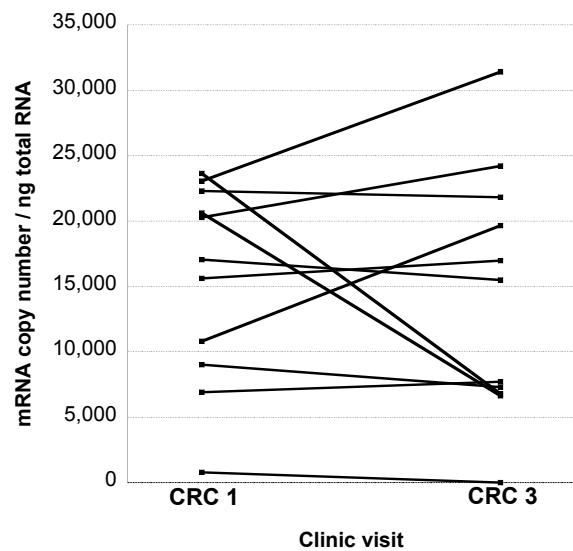

n3 PUFA

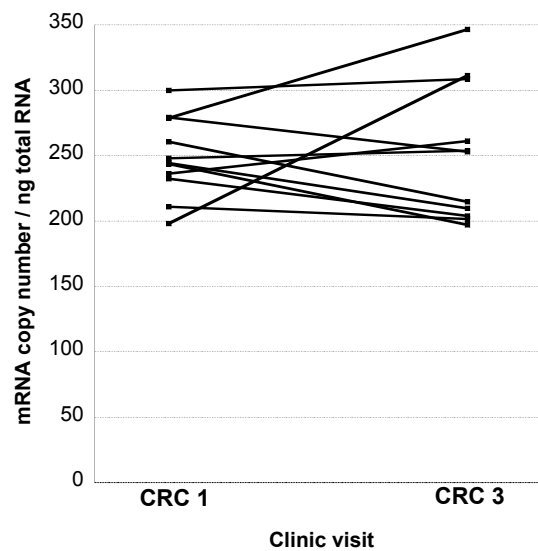

n3 PUFA

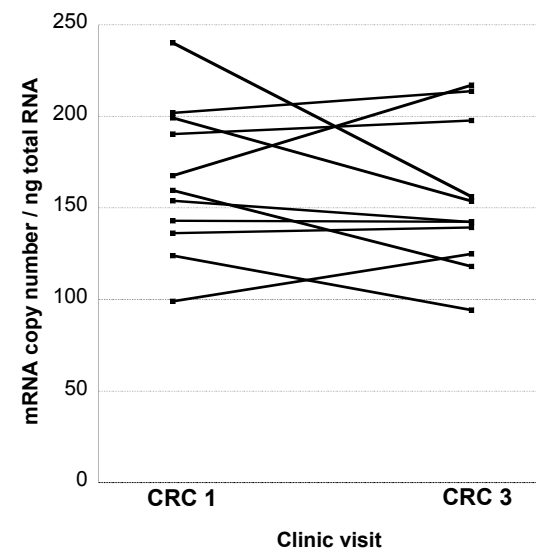

# Online Supporting Material

### j) PAI1 expression

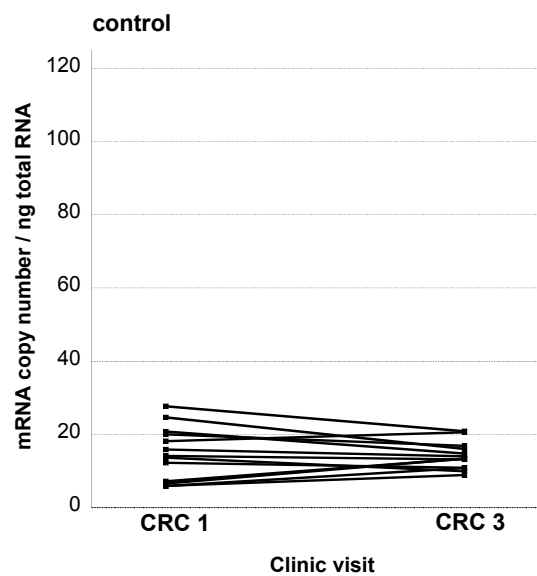

### k) NOS2 expression

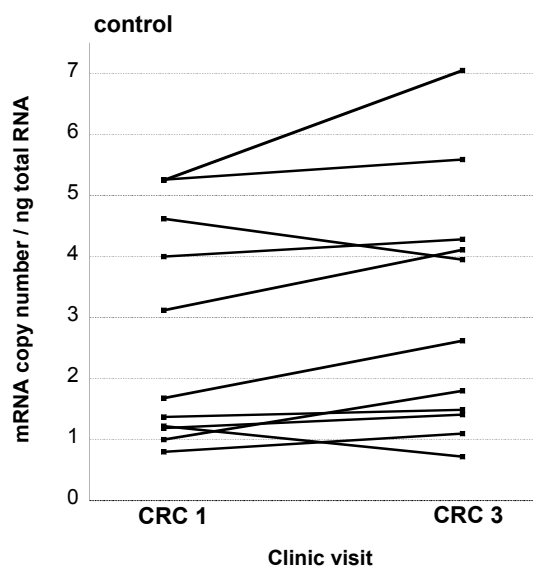

### l) NOS3 expression

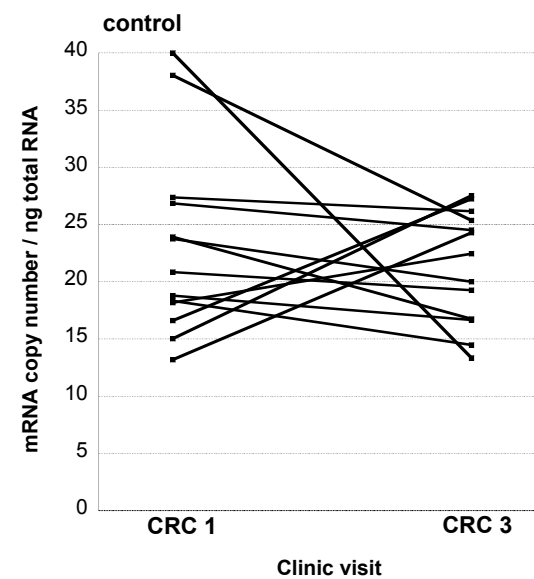

### n3 PUFA

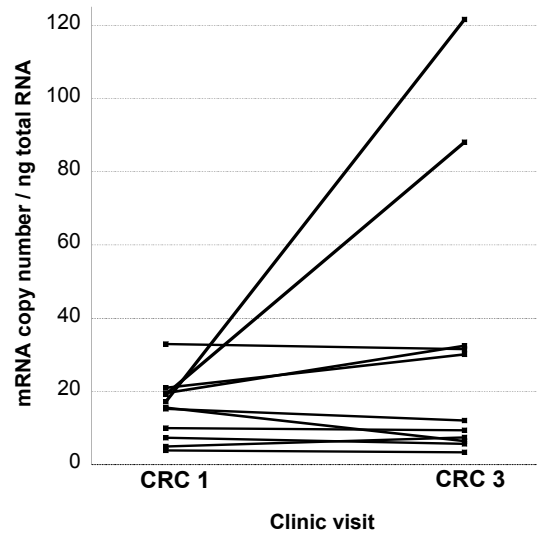

### n3 PUFA

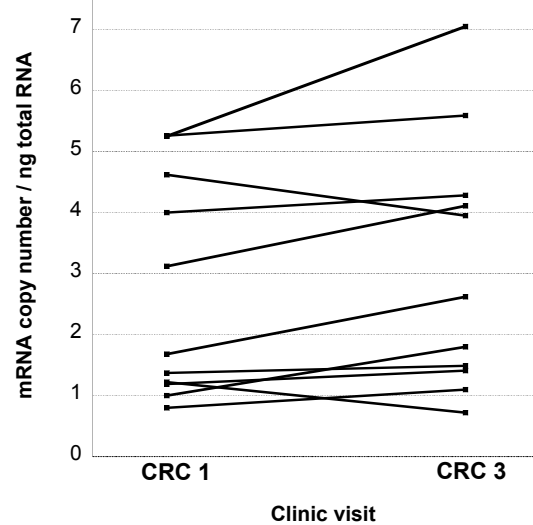

### n3 PUFA

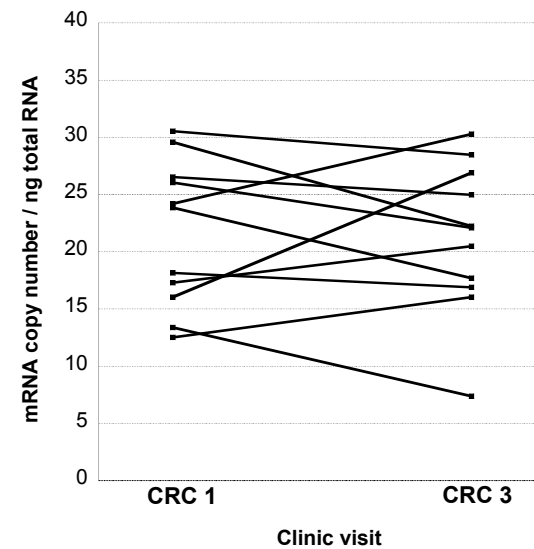

Online Supporting Material

m) *HAS2* expression

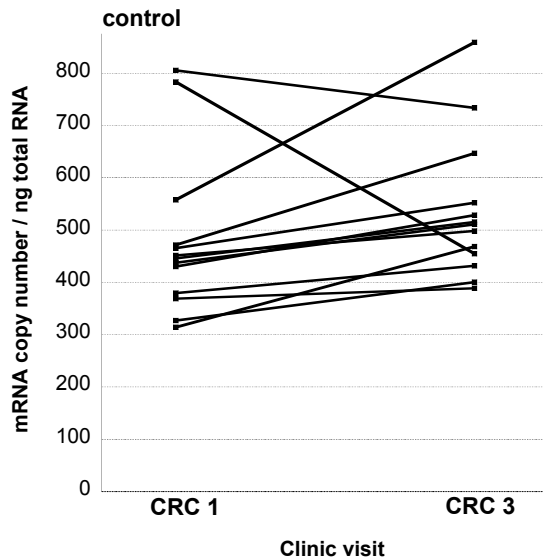

**Supplemental Figure 1. Individual change in adipose tissue gene expression in overweight to moderately obese men and women after 14 weeks of control or n3 PUFA-enriched diet treatment.** Data presented are mRNA copy number per ng total RNA at baseline (CRC 1) and again at the end of the intervention (CRC3) for panels a) *TNF $\alpha$* , b) *IL6*, c) *CD14*, d) *CCL2*, e) *ADIPOQ*, f) *ICAM1*, g) *SAA1*, h) *CD206*, i) *TLR4*, j) *PAI1*, k) *NOS2*, l) *NOS3*, m) *HAS2*. Samples were batch analyzed and normalized based on three housekeeping genes.

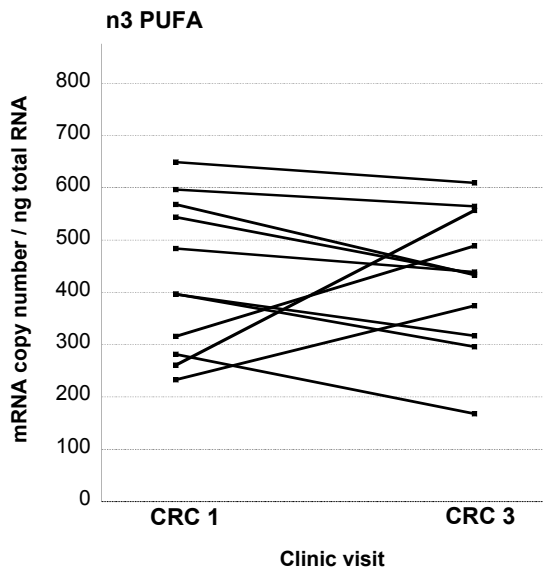

Supplement: jn.113.174383_nutrition174383SupplementaryData1.pdf [file jn.113.174383_nutrition174383SupplementaryData1.pdf]
