# Supplementary material
Source: PubMed Central journal article supplement (PMC3709995)
Supplement: jn.113.174383_nutrition174383SupplementaryData2.pdf [file jn.113.174383_nutrition174383SupplementaryData2.pdf]

Online Supporting Material

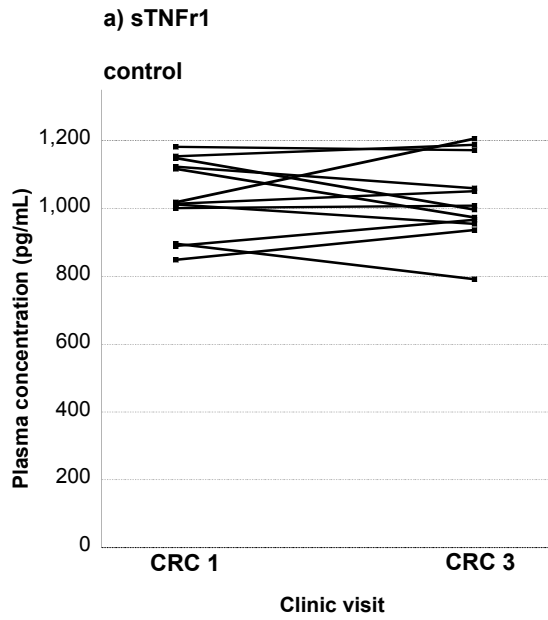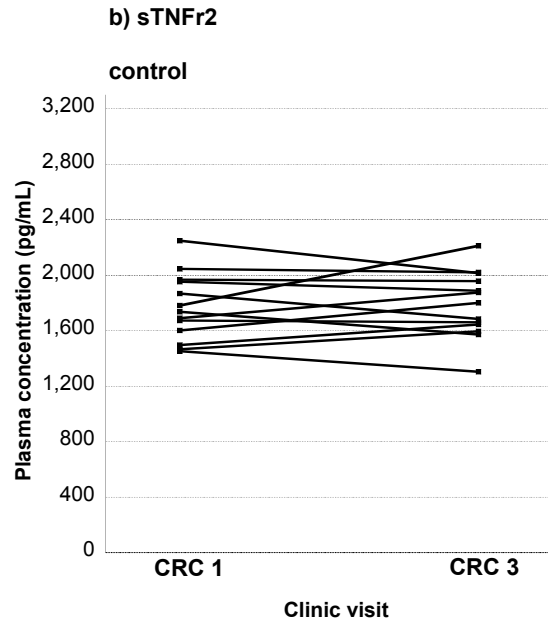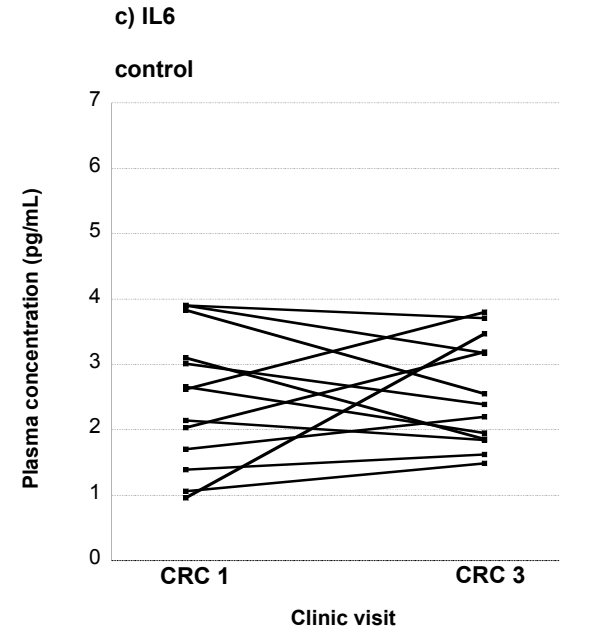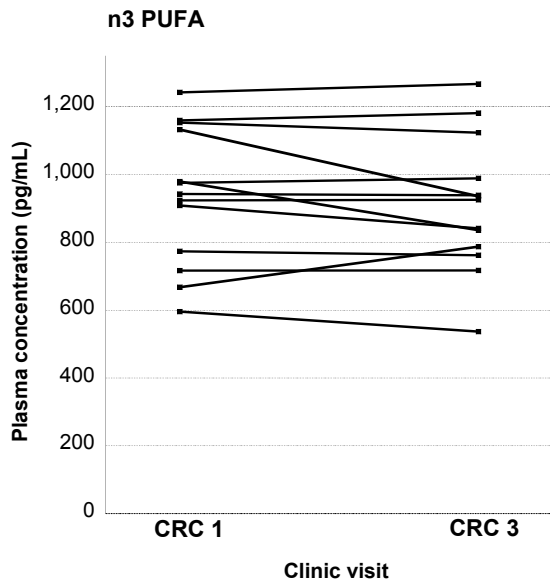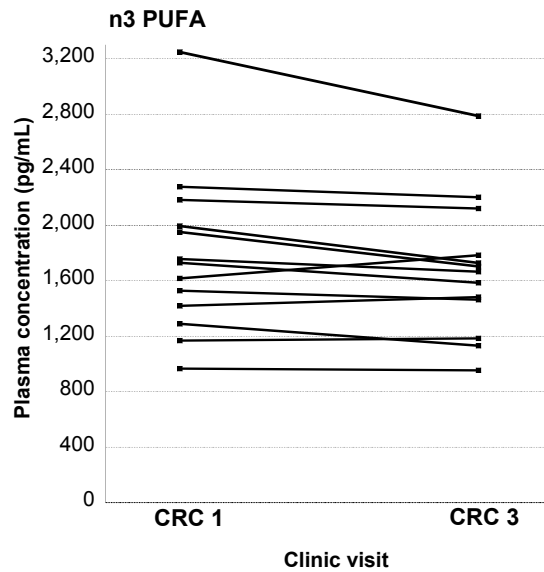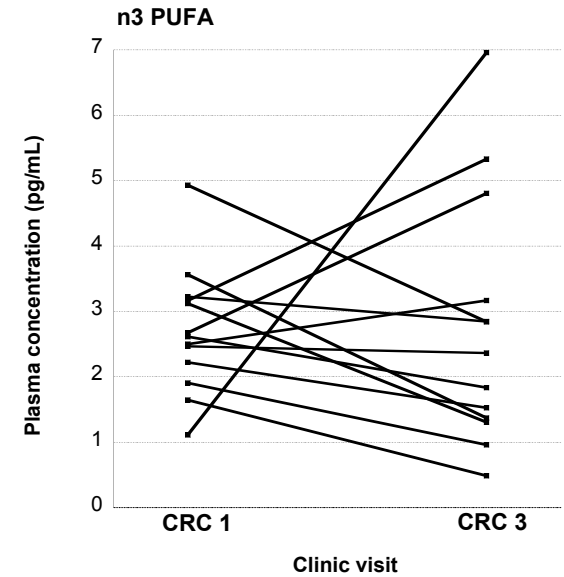

Online Supporting Material

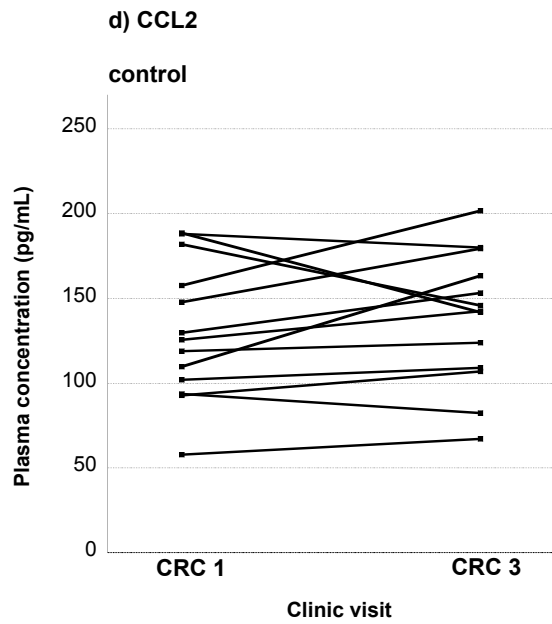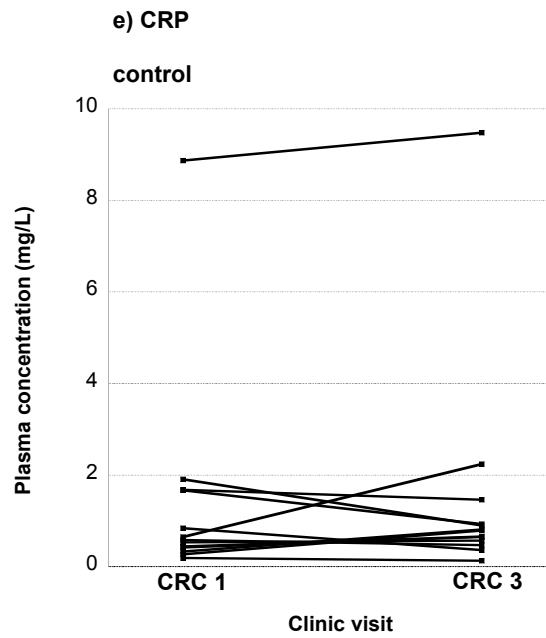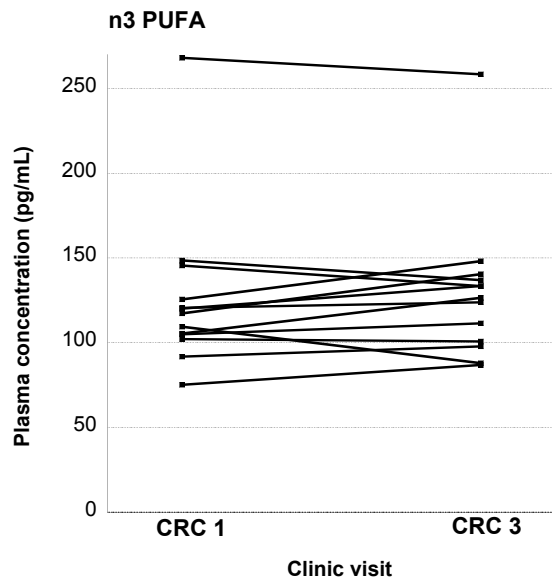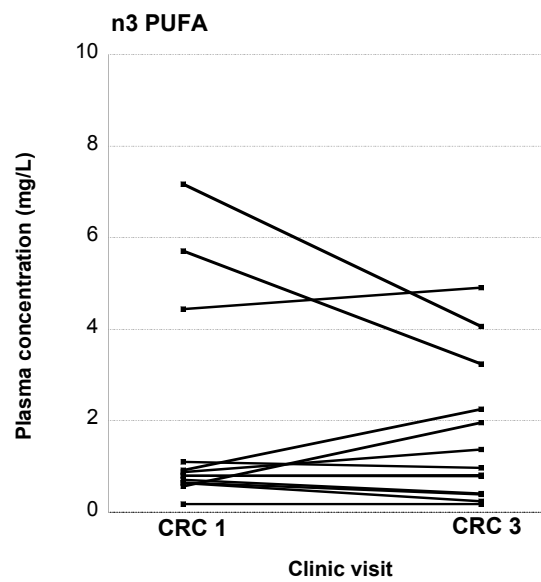

**Supplemental Figure 2. Individual change in plasma markers of inflammation in overweight to moderately obese men and women after 14 weeks of control or n3 PUFA-enriched diet treatment.** Data presented are plasma concentrations at baseline (CRC 1) and again at the end of the intervention (CRC3) for panels a) sTNFr1, b) sTNFr2, c) IL6, d) CCL2, e) CRP.
