# Supplementary material
Source: PubMed Central journal article supplement (PMC3709995)
Supplement: jn.113.174383_nutrition174383SupplementaryData3.pdf [file jn.113.174383_nutrition174383SupplementaryData3.pdf]

Online Supporting Material

**Supplemental Table 1.** Baseline characteristics of overweight and moderately obese subjects compared to normal weight subjects<sup>1</sup>

|                                                             | Normal weight<br>(n = 5)    | Overweight and<br>obese<br>(n = 24) | p-value <sup>2</sup> |
|-------------------------------------------------------------|-----------------------------|-------------------------------------|----------------------|
| <i>n</i> (female/male)                                      | 5 (2/3)                     | 24 (16/8)                           | n/a                  |
| Age (y)                                                     | 36.2 ± 12.6                 | 39.0 ± 13.2                         | 0.67                 |
| Body weight (kg)                                            | 76.8 ± 11.1                 | 84.8 ± 10.1                         | 0.19                 |
| Body mass index (kg/m <sup>2</sup> )                        | 23.5 ± 0.8                  | 30.1 ± 1.2                          | <0.001               |
| Plasma hsCRP (mg/L) <sup>3</sup>                            | 0.7 ± 0.5<br>0.5 (0.3, 1.2) | 1.8 ± 2.4<br>0.8 (0.5, 1.7)         | 0.17                 |
| Plasma IL-6 (pg/mL)                                         | 0.8 ± 0.7                   | 2.7 ± 1.0                           | 0.001                |
| Plasma total adiponectin (µg/mL)                            | 8.4 ± 3.4                   | 4.2 ± 1.9                           | 0.052                |
| Plasma sTNFr1 (µg/mL)                                       | 954 ± 334                   | 993 ± 172                           | 0.81                 |
| Plasma sTNFr2 (µg/mL)                                       | 3,390 ± 965                 | 1,800 ± 460                         | 0.020                |
| Adipose tissue <i>TNF</i> α (mRNA copy number) <sup>3</sup> | 4.2 ± 2.3<br>4.0 (2.0, 6.5) | 8.0 ± 3.9<br>7.0 (6.0, 8.8)         | 0.056                |

## Online Supporting Material

|                                                              |                                  |                                  |       |
|--------------------------------------------------------------|----------------------------------|----------------------------------|-------|
| Adipose tissue <i>ADIPOQ</i> (mRNA copy number)              | 11,600 ± 3,610                   | 6,420 ± 1,360                    | 0.031 |
| Adipose tissue <i>IL-6</i> (mRNA copy number) <sup>3</sup>   | 2.6 ± 2.5<br>2.0 (1.0, 4.5)      | 44 ± 77<br>20.5 (18.3, 32.5)     | 0.001 |
| Adipose tissue <i>ICAM-1</i> (mRNA copy number) <sup>3</sup> | 53.6 ± 20.4<br>53.0 (34.5, 73.0) | 51.5 ± 13.9<br>49.0 (44.3, 56.5) | 0.97  |

<sup>1</sup> Values are means ± SD or means ± SD and median (interquartile range). The adipose tissue gene expression data were normalized across three housekeeping genes.

<sup>2</sup> 2-tailed t-test for equality of means; unequal variance assumed.

<sup>3</sup> Non-normal distributions, statistical analysis run on log transformed data.

IL-6: interleukin-6, hsCRP: high sensitivity C-reactive protein, PUFA: polyunsaturated fatty acids, TNF  $\alpha$ : tumor necrosis factor alpha.
